1 **SapTrap assembly of *C. elegans* MosSCI transgene vectors**

2

3 Xintao Fan\*, Sasha De Henau†, Julia Feinstein\*, Stephanie I. Miller\*, Bingjie Han\*, Christian

4 Frøkjær-Jensen‡ and Erik E. Griffin\*

5

6 \* Department of Biological Sciences, Dartmouth College, Hanover NH 03755

7 † Center for Molecular Medicine, Molecular Cancer Research, University Medical Center

8 Utrecht, 3584 CG Utrecht, The Netherlands

9 ‡ King Abdullah University of Science and Technology (KAUST), Biological and Environmental

10 Science and Engineering Division (BESE), KAUST Environmental Epigenetics Program

11 (KEEP), Thuwal 23955-6900, Saudi Arabia

12 Running Title: SapTrap assembly of MosSCI vectors

13

14 Key words: MosSCI, *C. elegans*, mitochondria, endoplasmic reticulum, SapTrap

15

16 Corresponding Author:

17 Erik E. Griffin

18 78 College Street, LSC 348

19 Department of Biological Sciences

20 Dartmouth College

21 Hanover NH, 03755

22 603-646-8269

23 erik.e.griffin@dartmouth.edu

24 **Abstract**

25 The Mos1-mediated Single-Copy Insertion (MosSCI) method is widely used to establish stable  
26 *Caenorhabditis elegans* transgenic strains. Cloning MosSCI targeting plasmids can be  
27 cumbersome because it requires assembling multiple genetic elements including a promoter, a  
28 3'UTR and gene fragments. Recently, Schwartz and Jorgensen developed the SapTrap method  
29 for the one-step assembly of plasmids containing components of the CRISPR/Cas9 system for *C.*  
30 *elegans* (Schwartz and Jorgensen 2016 Genetics, 202:1277-1288). Here, we report on the  
31 adaptation of the SapTrap method for the efficient and modular assembly of a promoter, 3'UTR  
32 and either 2 or 3 gene fragments in a MosSCI targeting vector in a single reaction. We generated  
33 a toolkit that includes several fluorescent tags, components of the ePDZ/LOV optogenetic  
34 system and regulatory elements that control gene expression in the *C. elegans* germline. As a  
35 proof of principle, we generated a collection of strains that fluorescently label the endoplasmic  
36 reticulum and mitochondria in the hermaphrodite germline and that enable the light-stimulated  
37 recruitment of mitochondria to centrosomes in the one-cell worm embryo. The method described  
38 here offers a flexible and efficient method for assembly of custom MosSCI targeting vectors.

## 39 **Introduction**

40           The rich toolbox of techniques available to manipulate gene expression in *C. elegans* is a  
41 major attraction of this model organism. Several approaches have been developed to introduce  
42 transgenes and to induce efficient CRISPR/Cas9 mediated gene editing (Nance and Frøkjær-  
43 Jensen, 2019). The Mos1-mediated Single-Copy Insertion (MosSCI) method has been widely  
44 adopted to introduce transgenes in *C. elegans* because single-copy transgenes are integrated at  
45 defined chromosomal positions, thereby mitigating potential concerns of transgene integration at  
46 random positions (Frøkjær-Jensen et al., 2012; Frøkjær-Jensen et al., 2008; Frøkjær-Jensen et al.,  
47 2014). MosSCI transgene integration results from homologous recombination between a MosSCI  
48 targeting vector containing the transgene construct and one of the safe-harbor integration sites  
49 that have been engineered at defined positions in the genome.

50           Transgenes typically include multiple genetic elements including a promoter, one or more  
51 gene fragments and a 3'UTR. A number of strategies can be used to assemble these elements  
52 together including traditional restriction enzyme cloning, Gateway cloning (Hartley et al., 2000),  
53 *in vivo* recombineering (Philip et al., 2019) or Gibson cloning (Gibson et al., 2009). Each of  
54 these strategies has both advantages and disadvantages. For example, Gateway cloning allows  
55 the efficient modular “mix and match” cloning of large collections of promoter, ORF and 3'UTR  
56 cassettes (Brasch et al., 2004; Dupuy et al., 2004; Mangone et al., 2010; Zeiser et al., 2011).  
57 However, Gateway cloning can be expensive due to the required use of proprietary enzyme  
58 mixes and leaves ~25 base pair *att* recombination site “scars” at each cassette junction. In  
59 contrast, Gibson cloning allows the efficient, “scar-free” assembly of multiple gene fragments  
60 but does not allow the “mix and match” cloning of existing cassettes, making this approach  
61 laborious if many constructs are needed.

62 Schwartz and Jorgensen recently developed the SapTrap method for efficient, modular  
63 and single step assembly of CRISPR/Cas9 vectors for *C. elegans* (Schwartz and Jorgensen,  
64 2016). The SapTrap method is based on the Golden Gate cloning technique (Engler et al., 2008)  
65 and takes advantage of the SapI type II restriction enzyme, which cuts DNA at defined positions  
66 adjacent to its recognition sequence to generate three-base 5' overhangs. By designing SapI  
67 restriction fragments with complementary overhangs, multiple fragments can be assembled  
68 together in a defined order in a single digestion and ligation reaction. In this study, we report on  
69 the adaptation of the SapTrap system for the efficient, inexpensive, modular, and “scar-free”  
70 assembly of transgenes in a MosSCI targeting vector. We have developed a toolkit for  
71 expression of transgenes in the *C. elegans* germline, including a collection of cassettes  
72 containing tags for fluorescence imaging and for the ePDZ/LOV optogenetic system (Fielmich et  
73 al., 2018; Strickland et al., 2012). As a proof of principle, we have used this system to generate a  
74 collection of mitochondrial and endoplasmic reticulum reporter strains and a strain in which light  
75 induces the transport of mitochondria to centrosomes in the one-cell worm embryo.

76

## 77 **Results and Discussion**

### 78 *Adaptation of the SapTrap system for cloning MosSCI targeting vectors*

79 To adapt the SapTrap approach (Schwartz and Jorgensen, 2016) for the assembly of  
80 MosSCI targeting vectors, we started by making two changes to the universal MosSCI targeting  
81 vector pCFJ350 (Frøkjær-Jensen et al., 2012), which targets transgenes for insertion at the  
82 commonly used *tTi5605* site (Frøkjær-Jensen et al., 2008). First, we introduced single base pair  
83 changes to disrupt the two SapI restriction sites located in the “Left” and “Right” homology arms  
84 of pCFJ350. Second, we inserted two SapI sites into the multiple cloning site that were oriented

85 such that they are removed from the vector backbone by digestion with SapI. The resulting  
86 MosSCI targeting vector was named pXF87 (Figure 1A).

87  
88 We next cloned a series of plasmids that contain donor cassettes flanked by SapI  
89 restrictions sites (Figure 1B). Following digestion with SapI, the cassettes are liberated from the  
90 vector backbone and are flanked by 5' overhangs that direct their order of assembly in pXF87  
91 (Figure 1C). A four-insert cassette system was designed with a promoter in cassette 1, gene  
92 fragments in cassettes 2 and 3 (typically a gene and a tag) and a 3'UTR in cassette 4. To  
93 minimize the inclusion of extraneous sequences, the junctions between the first and second  
94 cassette is the translation start (ATG), between second and third cassettes is glycine (GGT) and  
95 between the third and fourth cassettes is the ochre translation stop codon (TAA) (Figure 1C).  
96 Donor cassettes encoding tags (such as fluorescent proteins) include short flexible linkers at the  
97 protein fusion site (the carboxy terminus of cassette 2 and the amino terminus of cassette 3)  
98 (Supplemental Figure S1- S7). The currently available promoter, tag and 3'UTR donor cassette  
99 plasmids are listed in Figure 1E and Table 1.

100  
101 The *C. elegans* germline is a notoriously difficult tissue in which to achieve stable  
102 transgene expression due to silencing of multi-copy extra-chromosomal arrays (Kelly et al.,  
103 1997), single-copy insertions generated by MosSCI (*e.g.*, (Frøkjær-Jensen et al., 2016;  
104 Shirayama et al., 2012)) or endogenous genes tagged using CRISPR/Cas9 gene editing (*e.g.*,  
105 (Fielmich et al., 2018)). Each of our tag donor cassettes encoding gene tags incorporates at least  
106 one modification that buffers against silencing, including the inclusion of PATC introns in  
107 HaloTag and ceGFP (Frøkjær-Jensen et al., 2016), the elimination of piRNA binding sites in

108 mScarlet, mKate2 and Dendra2 (Seth et al., 2018; Zhang et al., 2018) and the use of sequence  
109 motifs found in native germline genes in ePDZ and the LOV domain (Fielmich et al., 2018).

110

111           Similar to the SapTrap method developed by Schwartz and Jorgensen (Schwartz and  
112 Jorgensen, 2016), MosSCI targeting vectors were assembled in a single tube by incubating  
113 pXF87, four donor cassette plasmids, SapI enzyme, ATP and T4 DNA ligase at 25°C for 22 - 24  
114 hours (Figure 1D and Materials and Methods). This reaction was then transformed into *E. coli*  
115 and plasmid clones were screened by restriction enzyme digestion followed by sequencing. We  
116 assembled nine vectors using the 4-cassette system and 32 of 46 (69.6%) of the plasmids  
117 screened had the correct restriction digest pattern (Table 2). Of the vectors with the correct  
118 restriction digest pattern, 22 of 23 were correct based on Sanger sequencing analysis. Therefore,  
119 the SapTrap method provides an efficient method for the assembly of MosSCI targeting vectors.

120

#### 121 *A collection of fluorescent ER and mitochondria strains*

122           We used SapTrap-assembled MosSCI targeting vectors to generate a collection of  
123 transgenic strains for analysis of endoplasmic reticulum and mitochondrial dynamics. We first  
124 targeted GFP, mKate2, mScarlet, Dendra2 and HaloTag to the cytoplasmic face of the  
125 mitochondrial outer membrane by fusing them to the carboxy terminus of TOMM-20. The  
126 expression of these transgenes was controlled by the *mex-5* promoter and by the *pie-1* 3'UTR,  
127 which results in germline expression that increases around the bend of the adult hermaphrodite  
128 gonad (Merritt et al., 2008) (Figure 2A). Strains expressing TOMM-20 fused to HaloTag were  
129 labeled with the fluorescent JF<sub>646</sub> HaloTag ligand (Grimm et al., 2015) by feeding  
130 hermaphrodites bacteria mixed with the ligand. Each TOMM-20 fusion protein exhibited the

131 expected tubular localization pattern in the early embryo (Figure 2B-I). We confirmed that  
132 TOMM-20::HaloTag colocalized to the same organelle as the mitochondrial matrix protein  
133 COX-4::GFP (Raiders et al., 2018) (Figure 2C). We additionally generated strains in which the  
134 HaloTag was targeted to the mitochondrial matrix (COX-4::HaloTag) (Figure 2J) and the lumen  
135 of the endoplasmic reticulum (HSP-70(aa1-19)::HaloTag::HDEL) (Figure 2K). We fused both  
136 GFP and HaloTag to NPP-20, the worm homologue of SEC13, which is both a component of the  
137 COPII coat that concentrates to ER exit sites (ERES) (D'Arcangelo et al., 2013) and a component  
138 of nuclear pore complexes (Siniosoglou et al., 1996) (Figure 2L, M).

139

#### 140 **Five-cassette system**

141 One of the advantages of the SapTrap approach is that it can be easily expanded to  
142 include additional insert fragments to create more complex transgenes. To establish a five-  
143 cassette system, we used the cassettes 1, 2 and 4 from the four-cassette system and replaced  
144 cassette 3 with cassettes 3A and 3B (Figure 3A). We used this approach to generate an  
145 optogenetic system to control the localization of mitochondria in the early embryo based on the  
146 light induced interaction between the ePDZ and LOV domains (Fielmich et al., 2018; Strickland  
147 et al., 2012). We assembled a MosSCI targeting vector that directed expression of TOMM-  
148 20::HaloTag::LOV, which targets the LOV domain to the mitochondrial outer membrane. 11 of  
149 15 assembled plasmids had the corrected restriction digest pattern and 2 of 2 of these plasmids  
150 were correct by sequence analysis. A TOMM-20::HaloTag::LOV strain was crossed with a strain  
151 in which the dynein heavy chain DHC-1 was fused to ePDZ (Fielmich et al., 2018). Whereas  
152 mitochondria in wild-type embryos are dispersed through the cytoplasm (Figure 4A), upon the  
153 recruitment of ePDZ::mCherry::DHC-1 to mitochondria by stimulation with 488 nm light,



154 mitochondria were transported on to centrosomes, leaving the peripheral cytoplasm largely  
155 devoid of mitochondria (Figure 4B).

156

157         The SapTrap system described here provides an efficient and simple method for the  
158 assembly of MosSCI targeting vectors. This approach is similar to the Gateway assembly system  
159 (ThermoFisher Scientific) in that once donor cassette plasmids are cloned, they can be assembled  
160 in any modular combination. The Gateway system has been widely used to generate MosSCI  
161 transgenes and is attractive because there are large collections of promoter, ORF, and 3'UTR  
162 donor plasmids available (Brasch et al., 2004; Dupuy et al., 2004; Mangone et al., 2010; Zeiser et  
163 al., 2011). However, the Gateway system has disadvantages, including i) ~25 bp *att*  
164 recombination sites present between each cassette after assembly, ii) the cost of proprietary  
165 enzyme mixes, and iii) the difficulty in assembling more than four cassettes together. In contrast,  
166 the SapTrap system i) uses three-base pair junctions, two of which are designed to encode the  
167 translation start and STOP codons, ii) is relatively inexpensive, and iii) can efficiently assemble  
168 at least 5 cassettes. In principle, the number of cassettes could be increased if desired. The most  
169 significant consideration in generating new donor cassette plasmids for SapTrap assembly is that  
170 internal SapI sites cannot be present within the donor cassette sequence. Gibson cloning also  
171 allows the “scar-free” cloning of transgene vectors, but the specific cloning strategies must be  
172 designed for each unique vector. While we have focused on generating transgenes expressed in  
173 the hermaphrodite germline, the MosSCI targeting vector pXF87, the gene tag donor cassettes  
174 and cloning approach described here should be readily adaptable to expressing transgenes in  
175 other tissues.

176

177           The advantages of tagging and fluorescently labeling proteins with the HaloTag include  
178 increased brightness and photostability (especially compared to red fluorescent proteins) and  
179 excellent optical pairing with green fluorescent proteins for 2-color imaging. Additionally,  
180 HaloTag labeling offers the flexibility to label a single strain with either JF<sub>549</sub> HaloTag ligand or  
181 JF<sub>646</sub> HaloTag ligand (Grimm et al., 2015). The disadvantages of HaloTag labeling include the  
182 need to introduce the fluorescent ligand (for example, using small scale liquid culture) and the  
183 cost of the ligand. Additionally, care should be taken to optimize labeling procedures for each  
184 protein to maximize labeling efficiency and minimize background from free ligand. In practice,  
185 we find that HaloTag labeling is particularly useful when photobleaching of conventional  
186 fluorescent proteins is limiting and/or when imaging in far red is advantageous.

187

188

## 189 **Materials and Methods**

### 190 *C. elegans*

191 *C. elegans* hermaphrodite strains were maintained at either 20°C or 25°C on Nematode Growth  
192 Medium (NGM) plates containing 3 g/L NaCl, 2.5 g/L peptone and 17 g/L agar supplemented  
193 with 1 mM CaCl<sub>2</sub>, 1 mM MgSO<sub>4</sub>, 1 mM KPO<sub>4</sub> and 5 mg/L Cholesterol with *E. coli* OP50 as a  
194 source of food. All strains used in this study are listed in Table 4.

195

### 196 *Cloning*

197           To generate the expression vector pXF87, the two SapI restriction sites in pCFJ350  
198 (Frøkjær-Jensen et al., 2012) were mutated using Q5 Site-Directed Mutagenesis (New England

199 Biolabs) with the oligo pairs XF30F/XF30R and XF31F/XF31R. In addition, the annealed oligos  
200 Eg717 and Eg718 were cloned between the XhoI and SpeI sites of pCFJ350.

201 HaloTag and ceGFP containing PATC-rich endogenous introns were generated in several  
202 steps. First, genes were designed *in silico* to minimize germline silencing and increase  
203 expression by codon adaptation (Redemann et al., 2011), removal of homology to piRNAs  
204 (Batista et al., 2008), and inclusion of a short endogenous intron from *rpl-18* and four synthetic  
205 introns (Okkema et al., 1993) using the freely available gene editor ApE (M. Wayne Davis,  
206 unpublished). Second, the synthetic genes were synthesized as gBlocks (IDT), cloned into a  
207 plasmid, and sequence verified. Third, PATC-rich introns from a gene that is resistant to  
208 germline silencing, *smu-1* (Spike et al., 2001), were introduced into the synthetic genes by  
209 Golden Gate cloning as described previously (Frøkjær-Jensen et al., 2016). Finally, correct  
210 splicing and expression was verified by expression of the synthetic genes with and without  
211 PATC-rich introns using an *eft-3* promoter and *tbb-2* 3'UTR.

212 Donor cassette plasmids numbered pXF, pJF and pSM were generated by cloning PCR  
213 products into the pCR BluntII vector backbone using the Zero Blunt™ Topo™ system (Thermo  
214 Fisher Scientific). pSDH donor cassette plasmids were cloned by ligating PCR products into  
215 pSDH76, a derivative of pCR BluntII containing two XcmI sites that generate T-overhangs  
216 following digestion with XcmI. PCR primers for each plasmid are listed in Table 3. pXF87 and  
217 all donor plasmids were sequence verified.

218 To assemble HSP-70 (aa1-19) into the first cassette position of the expression vector  
219 pXF108, 10mM of oligos XF17F and XF17R were gradually cooled from 95°C to 25°C in a  
220 BioRad T1000 thermocycler. Annealed oligos were phosphorylated by T4 polynucleotide kinase

221 (NEB) for two hours at 37°C followed by 65°C for 20 minutes. The donor and primers plasmids  
222 are listed in Tables 1 and 3, respectively.

223

#### 224 *Assembly reaction*

225 Assembly reactions 50  $\mu$ L included 1 nM of pXF87 and each donor cassette plasmid, 400  
226 units of T4 DNA ligase (NEB), 10 units of SapI enzyme (NEB), 1X NEB CutSmart buffer and 1  
227 mM ATP. For assemblies including annealed oligos, phosphorylated annealed oligos were used  
228 at a final concentration of 3 nM in the assembly reaction. Reactions were incubated for 22-24  
229 hours at 25°C, transformed into Stellar Competent cells (Clontech). Four to six plasmid clones  
230 were first screened by restriction digest with XhoI and SpeI. Plasmids with the correct restriction  
231 digest pattern were sequenced across each cassette boundary. MosSCI targeting vector assembly  
232 reactions are listed in Table 2. Note that because the background of unassembled vectors in our  
233 assembly reactions was typically low, our protocol omits the counterselection restriction enzyme  
234 step described in the original SapTrap protocol (Schwartz and Jorgensen, 2016).

235

#### 236 *Transgenesis*

237 Double strand breaks at Mos1 landing sites were generated using CRISPR/Cas9. With  
238 the exception of strains EGD615, EGD629, EGD631 and EGD633, injection mixes contained 50  
239 ng/ $\mu$ L assembled MosSCI targeting vectors and pXW7.01 and pXW7.02 sgRNA/Cas9  
240 vectors (gifts from Katya Voronina, University of Montana), which generate double strand  
241 breaks at the *ttTi5605* universal MosSCI insertion site. For strains EGD615, EGD629, EGD631  
242 and EGD633, injection mixes contained 0.25  $\mu$ g/ $\mu$ L Cas9 protein, 0.1  $\mu$ g/ $\mu$ L tracrRNA, 0.028  
243  $\mu$ g/ $\mu$ L crRNAs BH0278

244 (GCGUCUUCGTACCUUUUUGGGUUUUAGAGCUAUGCUGUUUUG) and BH0279  
245 (GUCCCAUCGAAGCGAAUAGGGUUUUAGAGCUAUGCUGUUUUG) (Dharmacon) and  
246 0.1 µg/µL assembled MosSCI plasmids. The universal MosSCI strains EG8078 or  
247 EG8079 (Frøkjær-Jensen et al., 2014) were injected, singled and incubated for 10 days at  
248 20°C. ~10 worms from plates containing non-Unc animals were transferred to new plates. Plates  
249 that stably gave rise to non-*unc* progeny were visually screened for fluorescent transgene  
250 expression.

251

### 252 *HaloTag staining*

253 20 to 30 L4 worms were stained in 25 µL S media containing concentrated OP50 bacteria  
254 and 2.5 µM of either JF<sub>549</sub> HaloTag ligand or JF<sub>646</sub> HaloTag ligand (Grimm et al., 2015) in a  
255 darkened 96 well plate shaking at 150 rpm for 19 hours at 23°C. Water was placed in the  
256 neighboring wells to help prevent evaporation. Animals were recovered on NGM plates for up to  
257 two hours before imaging.

258

### 259 *MitoTracker Deep Red staining*

260 L4 worms were fed overnight on an NGM plate that had been seeded with 100 µL concentrated  
261 OP50 bacteria mixed with 1 µL of 1 mM MitoTracker Deep Red FM dye (Cell Signaling  
262 Technology, Cat #8778S).

263

### 264 *Imaging*

265 With the exceptions of the TOMM-20::Dendra2 strain and optogenetic strains (Figure 4),  
266 all images were collected on a spinning-disk microscope built on a Nikon Eclipse Ti base and

267 equipped with an Andor CSU-W1 two camera spinning disk module, Zyla sCMOS cameras, an  
268 Andor ILE laser module and a Nikon 100X Plan Apo 1.45 NA oil immersion objective (Micro  
269 Video Instruments, Avon, MA).

270 TOMM-20::Dendra2 was imaged on a Marianas spinning disk microscope (Intelligent  
271 Imaging Innovations) built around a Zeiss Axio Observer Z.1 equipped with a Photometrics  
272 Evolve EMCCD camera, 50 mW 488 and 561 nm solid state lasers, a CSU-X1 spinning disk  
273 (Yokogawa, Tokyo Japan) and a Zeiss 100X Plan-Apochromat objective. Photoconversion was  
274 performed by 5 second illumination with a 405 epifluorescent light.

275 To stimulate the relocalization of mitochondria (Figure 4), embryos were illuminated  
276 with a 50 mW 640 nm solid-state laser used to excite MitoTracker DeepRed (20% laser power,  
277 100 msec exposure, camera gain of 1) and a 50 mW 488 nm solid-state laser used to stimulate  
278 the interaction between ePDZ and LOV domains (80% laser power and 100 msec exposure). A  
279 Plan-Apochromat 100x/1.4 NA oil immersion DIC objective (Zeiss) was used and Z-stacks (one  
280 micron step size, 11 steps) were collected at 60-second intervals. The images displayed in Figure  
281 4 are maximum intensity projections of three Z planes from the cell midplane.

282

### 283 *Data and reagent availability*

284 Strains and reagents are available upon request. Supplemental materials describing the sequence  
285 of tag donor cassettes are available through the GSA FigShare portal.

286

287

288

289

290 **Acknowledgements**

291 We thank Bing He and members of the Griffin lab for comments on the manuscript. We thank  
292 Katya Voronina (U. of Montana) for the plasmids pXW7.01 and pXW7.02. We thank Ann  
293 Lavanway and Zdenich Zvindrych of the Dartmouth Life Sciences Imaging Facility for  
294 assistance with imaging. The Molecular Biosciences core facility is supported by the Norris  
295 Cotton Cancer Center and by NCI grant 5P30CA023108-40. This work was supported by grants  
296 from the NIH (R01GM110194 to EEG), baseline funding from KAUST (to CFJ) and the NWO  
297 (016.Veni.181.051 to SDH). Erik Jorgensen (U. of Utah, HHMI) contributed resources to  
298 generate some of the transgenes from NIH grant R01GM095817.

299

300

301

302 **Figure Legends**

303 **Figure 1.** SapTrap assembly of MosSCI targeting vectors using the four-cassette system. **A.** The  
304 MosSCI targeting vector pXF87 was derived from pCFJ350 by mutating two SapI restriction  
305 sites (indicated by arrowheads in the “Left” (L) and “Right” (R) homology arms) and introducing  
306 two SapI sites (blue text) between the XhoI and SpeI sites (green text). SapI cleavage sites are in  
307 red text. The SapI recognition sites are oriented such that upon digestion they are removed from  
308 the vector backbone. The *cbr-unc-119* gene is used as a positive selection marker to facilitate the  
309 identification of transgenic animals. **B.** Design of the donor cassette vectors used for the 4-  
310 cassette cloning strategy. **C.** The curved dotted lines indicate the overhangs that anneal during  
311 the ligation reaction. **D.** Overview of the assembly protocol. For a detailed protocol, see the  
312 Materials and Methods section. **E.** Summary of available promoter, gene tag and 3’UTR donor  
313 cassette plasmids.

314  
315 **Figure 2.** Images of transgenic strains. **A.** Images of TOMM-20::HaloTag labeled with JF<sub>646</sub>  
316 HaloTag ligand in the adult gonad (outlined with curved dotted line), including an inset of the  
317 region in the stippled box. **B.** Images of embryos expressing TOMM-20::HaloTag labeled with  
318 JF<sub>646</sub> HaloTag ligand at the 1-cell, 4 cell and ~100 cell stages. **C.** Images of a 4 cell embryo  
319 expressing TOMM-20::HaloTag labeled with JF<sub>646</sub> HaloTag ligand (magenta) and COX-4::GFP  
320 (green) (Raiders et al., 2018). **D – F.** Images of embryos expressing the indicated transgenes at  
321 the 4-cell stage. **G – I.** Images of a 4 cell embryo expressing TOMM-20::Dendra2 before and  
322 after photoconversion (PC). Dendra2 switches from green to red fluorescence upon  
323 photoconversion. **J – M.** Images of embryos expressing the indicated transgenes at the 1-cell, 4  
324 cell and ~100 cell stages.



325

326 **Figure 3.** SapTrap assembly of MosSCI targeting vectors using the five-cassette system. **A.**

327 Schematic of pXF87 and the donor cassettes following SapI digestion. The dotted lines indicate

328 the overhangs that anneal during ligation. **B.** Summary of available promoter, gene tag and

329 3'UTR donor cassette plasmids for the five-cassette system.

330

331 **Figure 4.** Optogenetic control of mitochondrial distribution in the 1-cell embryo. **A.** Control

332 embryo stained with Mitotracker DeepRed and imaged with 488 nm and 640 nm illumination

333 (640 nm channel shown). **B.** 1-cell *epdz::mcherry::dhc-1; tomm-20::halotag::lov* embryo

334 stained with Mitotracker DeepRed and imaged with 488 nm and 640 nm illumination (640 nm

335 channel shown). The 488 nm illumination was used to stimulate the interaction between the

336 ePDZ and LOV domains.

337

338

339 **Literature Cited**

340 Batista, P. J., J. G. Ruby, J. M. Claycomb, R. Chiang, N. Fahlgren, *et al.*, 2008 PRG-1 and 21U-  
341 RNAs interact to form the piRNA complex required for fertility in *C. elegans*. *Mol. Cell* 31: 67-78.

342  
343 Brasch, M. A., J. L. Hartley, and M. Vidal, 2004 ORFeome cloning and systems biology:  
344 standardized mass production of the parts from the parts-list. *Genome Res.* 14:2001-2009.

345  
346 D'Arcangelo, J. G., K. R. Stahmer, and E. A. Miller, 2013 Vesicle-mediated export from the ER:  
347 COPII coat function and regulation. *Biochim. Biophys. Acta* 1833:2464-2472.

348  
349 Dupuy, D., Q. R. Li, B. Deplancke, M. Boxem, T. Hao, *et al.*, 2004 A first version of the  
350 *Caenorhabditis elegans* Promoterome. *Genome Res.* 14: 2169-2175.

351  
352 Engler, C., R. Kandzia, and S. Marillonnet, 2008 A one pot, one step, precision cloning method  
353 with high throughput capability. *PLoS One* 3: e3647.

354  
355 Fielmich, L. E., R. Schmidt, D. J. Dickinson, B. Goldstein, A. Akhmanova, *et al.*, 2018 Optogenetic  
356 dissection of mitotic spindle positioning in vivo. *Elife* 7: e38198.

357  
358 Frøkjær-Jensen, C., M. W. Davis, M. Ailion, and E. M. Jørgensen, 2012 Improved Mos1-  
359 mediated transgenesis in *C. elegans*. *Nat. Methods* 9: 117-118.

360

361 Frøkjaer-Jensen, C., M. W. Davis, C. E. Hopkins, B. J. Newman, J. M. Thummel, *et al.*, 2008  
362 Single-copy insertion of transgenes in *Caenorhabditis elegans*. *Nat. Genet.* 40: 1375-1383.  
363  
364 Frøkjaer-Jensen, C., M. W. Davis, M. Sarov, J. Taylor, S. Flibotte, *et al.*, 2014 Random and  
365 targeted transgene insertion in *Caenorhabditis elegans* using a modified Mos1 transposon. *Nat.*  
366 *Methods* 11: 529-534.  
367  
368 Frøkjaer-Jensen, C., N. Jain, L. Hansen, M. W. Davis, Y. Li, *et al.*, 2016 An Abundant Class of Non-  
369 coding DNA Can Prevent Stochastic Gene Silencing in the *C. elegans* Germline. *Cell* 166: 343-  
370 357.  
371  
372 Gibson, D. G., L. Young, R. Y. Chuang, J. C. Venter, C. A. Hutchison 3rd, *et al.*, 2009 Enzymatic  
373 assembly of DNA molecules up to several hundred kilobases. *Nat. Methods* 6: 343-345.  
374  
375 Grimm, J. B., B. P. English, J. Chen, J. P. Slaughter, Z. Zhang, *et al.*, 2015 A general method to  
376 improve fluorophores for live-cell and single-molecule microscopy. *Nat. Methods* 12: 244-250.  
377  
378 Hartley, J. L., G. F. Temple, and M. A. Brasch, 2000 DNA cloning using in vitro site-specific  
379 recombination. *Genome Res.* 10: 1788-1795.  
380 Kelly, W. G., S. Xu, M. K. Montgomery, and A. Fire, 1997 Distinct requirements for somatic and  
381 germline expression of a generally expressed *Caenorhabditis elegans* gene. *Genetics* 146: 227-  
382 238.

383

384 Mangone, M., A. P. Manoharan, D. Thierry-Mieg, J. Thierry-Mieg, T. Han, *et al.*, 2010 The  
385 landscape of *C. elegans* 3'UTRs. *Science* 329: 432-435.

386

387 Merritt, C., D. Rasoloson, D. Ko, and G. Seydoux, 2008 3' UTRs are the primary regulators of  
388 gene expression in the *C. elegans* germline. *Curr. Biol.* 18: 1476-1482.

389

390 Nance, J., and C. Frøkjær-Jensen. (2019). The *Caenorhabditis elegans* Transgenic Toolbox.  
391 *Genetics* 212, 959-990.

392

393 Okkema, P. G., S. W. Harrison, V. Plunger, A. Aryana, and A. Fire, 1993 Sequence requirements  
394 for myosin gene expression and regulation in *Caenorhabditis elegans*. *Genetics* 135: 385-404.

395

396 Philip, N. S., F. Escobedo, L. L. Bahr, B. J. Berry, and A. P. Wojtovich, 2019 Mos1 Element-  
397 Mediated CRISPR Integration of Transgenes in *Caenorhabditis elegans*. *G3* 9: 2629-2635.

398

399 Raiders, S.A., M. D. Eastwood, M. Bacher, and J. R. Priess, 2018 Binucleate germ cells in  
400 *Caenorhabditis elegans* are removed by physiological apoptosis. *PLoS Genet.* 14: e1007417.

401

402 Redemann, S., S. Schloissnig, S. Ernst, A. Pozniakowsky, S. Ayloo, *et al.*, 2011 Codon adaptation-  
403 based control of protein expression in *C. elegans*. *Nat. Methods* 8: 250-252.

404

405 Schwartz, M. L., and E. M. Jorgensen 2016 SapTrap, a Toolkit for High-Throughput CRISPR/Cas9  
406 Gene Modification in *Caenorhabditis elegans*. Genetics 202: 1277-1288.

407

408 Seth, M., M. Shirayama, W. Tang, E. Z. Shen, S. Tu, *et al.*, 2018 The Coding Regions of Germline  
409 mRNAs Confer Sensitivity to Argonaute Regulation in *C. elegans*. Cell Rep. 22: 2254-2264.

410

411 Shirayama, M., M. Seth, H. C. Lee, W. Gu, T. Ishidate, *et al.*, 2012 piRNAs initiate an epigenetic  
412 memory of nonself RNA in the *C. elegans* germline. Cell 150: 65-77.

413

414 Siniosoglou, S., C. Wimmer, M. Rieger, V. Doye, H. Tekotte, *et al.*, 1996 A novel complex of  
415 nucleoporins, which includes Sec13p and a Sec13p homolog, is essential for normal nuclear  
416 pores. Cell 84: 265-275.

417

418 Spike, C. A., J. E. Shaw, and R. K. Herman, 2001 Analysis of *smu-1*, a gene that regulates the  
419 alternative splicing of *unc-52* pre-mRNA in *Caenorhabditis elegans*. Mol. Cell Biol. 21: 4985-  
420 4995.

421

422 Strickland, D., Y. Lin, E. Wagner, C. M. Hope, J. Zayner, *et al.*, 2012 TULIPs: tunable, light-  
423 controlled interacting protein tags for cell biology. Nat Methods 9: 379-384.

424

425 Zeiser, E., C. Frøkjaer-Jensen, E. Jorgensen, and J. Ahringer, 2011 MosSCI and gateway  
426 compatible plasmid toolkit for constitutive and inducible expression of transgenes in the C.  
427 elegans germline. PLoS One 6: e20082.  
428  
429 Zhang, D., S. Tu, M. Stubna, W. S. Wu, W. C. Huang *et al.*, 2018 The piRNA targeting rules and  
430 the resistance to piRNA silencing in endogenous genes. Science 359: 587-592.

**Table 1.** Donor cassette plasmids used in this study.

| Name                                                                              | Description                                              |
|-----------------------------------------------------------------------------------|----------------------------------------------------------|
| <b>Cassette 1 for 4-cassette or 5 cassette system (5'-TGG ..... 3'-TAC)</b>       |                                                          |
| pXF121                                                                            | <i>mex-5</i> promoter                                    |
| pSDH60                                                                            | <i>spe-11</i> promoter                                   |
| <b>Cassette 2 for 4-cassette or 5-cassette system (5'-ATG-3' ..... 3'-CCA-5')</b> |                                                          |
| <b>Tags</b>                                                                       |                                                          |
| pXF89                                                                             | <i>halotag</i> (no STOP codon, PATC introns)             |
| pJF5                                                                              | <i>gfp</i> (no STOP codon, PATC introns)                 |
| pXF222                                                                            | <i>mkate2</i> (no STOP codon)                            |
| pSDH61                                                                            | <i>epdz</i> (no STOP codon)                              |
| pSM10                                                                             | <i>mscarlet</i> (no STOP codon)                          |
| pSM12                                                                             | <i>dendra2</i> (no STOP codon)                           |
| <b>Genes</b>                                                                      |                                                          |
| pJF7                                                                              | <i>tomm-20</i> (no STOP codon)                           |
| pSDH50                                                                            | <i>tomm-20</i> (aa1-55) (no STOP codon)                  |
| pXF262                                                                            | <i>cox-4</i> (no STOP codon)                             |
| pXF250                                                                            | <i>npp-20</i> (no STOP codon)                            |
| <b>Cassette 3 for 4-cassette system (5'-GGT-3' ..... 3'-ATT-5')</b>               |                                                          |
| <b>Tags</b>                                                                       |                                                          |
| pXF88                                                                             | <i>halotag</i> (includes STOP codon, PATC introns)       |
| pJF6                                                                              | <i>gfp</i> (includes STOP codon, PATC introns)           |
| pXF130                                                                            | <i>mkate2</i> (includes STOP codon)                      |
| pSM08                                                                             | <i>mscarlet</i> (includes STOP codon)                    |
| pSM03                                                                             | <i>dendra2</i> (includes STOP codon)                     |
| <b>ORFs</b>                                                                       |                                                          |
| pXF90                                                                             | <i>halotag::HDEL</i> (includes STOP codon, PATC introns) |
| <b>Cassette 3A for 5-cassette system (5'-GGT-3' ..... 3'-TGC-5')</b>              |                                                          |
| <b>Tags</b>                                                                       |                                                          |
| pSDH51                                                                            | <i>halotag</i> (no STOP codon, PATC introns)             |
| pSM04                                                                             | <i>mkate2</i> (no STOP codon)                            |
| pSDH57                                                                            | <i>mscarlet</i> (no STOP codon)                          |
| <b>Cassette 3B for 5-cassette system (5'-ACG-3' ..... 3'-ATT-5')</b>              |                                                          |
| <b>Tags</b>                                                                       |                                                          |
| pXF276                                                                            | <i>lov</i> domain (includes STOP codon)                  |
| pSDH52                                                                            | <i>epdz</i> (includes STOP codon)                        |
| pSM05                                                                             | <i>mkate2</i> (includes STOP codon)                      |
| <b>Cassette 4 for 4-cassette or 5-cassette system (5'-TAA-3' ..... 3'-CAT-5')</b> |                                                          |
| pXF85                                                                             | <i>pie-1</i> 3'UTR                                       |
| pSDH54                                                                            | <i>tbb-2</i> 3'UTR                                       |
| pSDH66                                                                            | <i>unc-54</i> 3'UTR                                      |

Note: For the expression plasmid pXF108, the annealed oligos were used to generate HSP-70 in cassette 2.

**Table 2.** MosSCI targeting vectors used in this study.

| Name   | Comments                               | Assembly                        |          |        |              | Assembly efficiency |            |     |
|--------|----------------------------------------|---------------------------------|----------|--------|--------------|---------------------|------------|-----|
| pXF87  | MosSCI backbone                        | Derived from pCFJ350            |          |        |              |                     |            |     |
|        |                                        | Donor vectors used for assembly |          |        |              | Assembly efficiency |            |     |
|        |                                        | Cassettes                       |          |        |              | Digestion           | Sequencing |     |
|        |                                        | 1                               | 2        | 3      | 4            |                     |            |     |
| pJF13  | ER lumen, Halotag                      | pXF121                          | XF17F/R* | pXF90  | pXF85        | 4/5                 | 2/2        |     |
| pJF17  | Mitochondrial OM, Halotag              | pXF121                          | pJF7     | pXF88  | pXF85        | 4/5                 | 1/2        |     |
| pXF253 | ERES + nuclear pores (NPP-20), GFP     | pXF121                          | pXF 250  | pJF6   | pXF85        | 4/6                 | 2/2        |     |
| pXF255 | ERES + nuclear pores (NPP-20), Halotag | pXF121                          | pXF 250  | pXF88  | pXF85        | 5/6                 | 2/2        |     |
| pXF266 | Mitochondrial matrix, Halotag          | pXF121                          | pXF 262  | pXF88  | pXF85        | 1/4                 | 1/1        |     |
| pSM20  | Mitochondrial OM, mKate2               | pXF121                          | pJF7     | pXF130 | pXF85        | 4/5                 | 2/2        |     |
| pSM22  | Mitochondrial OM, mScarlet             | pXF121                          | pJF7     | pSM08  | pXF85        | 4/5                 | 2/2        |     |
| pSM17  | Mitochondrial OM, Dendra2              | pXF121                          | pJF7     | pSM03  | pXF85        | 4/5                 | 2/2        |     |
| pSM16  | Mitochondrial OM, GFP                  | pXF121                          | pJF7     | pJF6   | pXF85        | 2/5                 | 2/2        |     |
|        |                                        | 1                               | 2        | 3A     | 3B           | 4                   |            |     |
| pSDH68 | Mitochondrial OM, Halotag, LOV         | pXF121                          | pSDH50   | pSDH51 | PCR fragment | pSDH54              | 11/15      | 2/2 |

\* Annealed oligos.



**Table 3. Primers used in this study.**

| Name               | Description                 | Sequence (SAP1 site and Overhang)                          | Corresponding plasmid |
|--------------------|-----------------------------|------------------------------------------------------------|-----------------------|
| XF32F              | <i>mex-5 promoter</i> (F)   | GCAGCTCTTCGTTGGATATCAGTITTTAAAAAATA                        | pXF121                |
| XF32R              | <i>mex-5 promoter</i> (R)   | GCAGCTCTTCGATTCTCTGTCTGAAACA                               |                       |
| JF5F               | <i>tomm-20</i> (F)          | GCAGCTCTTCGATGTCGGACACAATTCTTGG                            | pJF7                  |
| JF5R               | <i>tomm-20</i> (R)          | GCAGCTCTTCGACCCTCCAAGTCGTCGGTGTCT                          |                       |
| JF1F               | <i>gfp</i> (F)              | GCAGCTCTTCGATGTCGAAGTAACACTTAGTTT                          | pJF5                  |
| JF1R               | <i>gfp</i> (R)              | GCAGCTCTTCGACCGCCGCTTCCCTGTAGAGCTCGTCCAT                   |                       |
| JF2F               | <i>gfp</i> (F)              | GCAGCTCTTCGGGTGGAAGCGGCTCAAGAACAATTAGTTT                   | pJF6                  |
| JF2R               | <i>gfp</i> (R)              | GCAGCTCTTCGTTACTTGTAGAGCTCGTCCAT                           |                       |
| XF17F              | <i>hsp-70 (1-19aa)</i> (F)  | ATGAAGACCTTATCTTGTGGGCTTGATCGCCCTATCCGCCGTCAGTGTCTACTGC    |                       |
| XF17R              | <i>hsp-70 (1-19aa)</i> (R)  | ACCGCAGTAGACACTGACGGCGGATAGGGCGATCAAGCCCAACAAGAATAAGGTCTT  |                       |
| spe-11(SAP C1) F   | <i>spe-11 promoter</i> (F)  | GCAGCTCTTCGTTGGTCCGACAGAACAATTTTCCGT                       | pSDH60                |
| spe-11(SAP C1) R   | <i>spe-11 promoter</i> (R)  | GCAGCTCTTCGATTATTTACTAGTCGGTTTGGCA                         |                       |
| XF24F              | <i>halotag</i> (F)          | GCAGCTCTTCGATGGCCGAGGTAACACTTAGTTTGT                       | pXF89                 |
| XF24R              | <i>halotag</i> (R)          | GCAGCTCTTCGACCGCCGCTTCTCCGGAGATCTCGAGGGT                   |                       |
| XF63F              | <i>mkate2</i> (F)           | GCAGCTCTTCGATGGTCTCCGAGCTCATAAAGAAAACA                     | pXF222                |
| XF63R              | <i>mkate2</i> (R)           | GCAGCTCTTCGACCACTCCACCTCCACGGTGTCCGAGCTTGG                 |                       |
| ePDZ (SAP C2) F    | <i>epdz</i> (F)             | GCAGCTCTTCGATGCCAGAGCTCGGATTTCTCAT                         | pSDH61                |
| ePDZ (SAP C2) R    | <i>epdz</i> (R)             | GCAGCTCTTCGACAGCTCCCGTCCGACGGGTGGATCAC                     |                       |
| XF79F              | <i>cox-4</i> (F)            | GCAGCTCTTCGATGATGCTGCCACGTTT                               | pXF262                |
| XF79R              | <i>cox-4</i> (R)            | GCAGCTCTTCGACCTTCCACTTCTTGTTCGTAATC                        |                       |
| XF76F              | <i>npp-20</i> (F)           | GCAGCTCTTCGATGACCACGGTCCGCCAG                              | pXF250                |
| XF76R              | <i>npp-20</i> (R)           | GCAGCTCTTCGACCTTCTGTAGCTCCCGAGCT                           |                       |
| XF23F              | <i>halotag</i> (F)          | GCAGCTCTTCGGGTGGAAGCGCCGAGGTAACACTTAGTTTGT                 | pXF88                 |
| XF23R              | <i>halotag</i> (R)          | GCAGCTCTTCGTTATCCGGAGATCTCGAGGGT                           |                       |
| XF53F              | <i>mkate2</i> (F)           | GCAGCTCTTCGGGTGGAGGTGGAGGTGTCTCCGAGCTCATAAAGAAAACA         | pXF130                |
| XF53R              | <i>mkate2</i> (R)           | GCAGCTCTTCGTTAACGGTGTCCGAGCTTGG                            |                       |
| XF22F              | <i>halotag::hdel</i> (F)    | GCAGCTCTTCGGGTGGAAGCGCCGAGGTAACACTTAGTTTGT                 | pXF90                 |
| XF22R              | <i>halotag::hdel</i> (R)    | GCAGCTCTTCGTTAGAGTTCGTATGTCGGAGATCTCGAGGGT                 |                       |
| SIM8F              | <i>mscarlet</i> (F)         | GCAGCTCTTCGATGGTCTCCAAGGGCGAGGCA                           | pSM10                 |
| SIM8R              | <i>mscarlet</i> (R)         | GCAGCTCTTCGACCACTCCACTTCCCTTGTACAGCTCGTCCATTCCT            |                       |
| SIM10F             | <i>dendra2</i> (F)          | GCAGCTCTTCGATGAACCTTATTAAGGAAGATATG                        | pSM12                 |
| SIM10R             | <i>dendra2</i> (R)          | GCAGCTCTTCGACCGCCGCTTCCCACTTACTTGACTTGGTAG                 |                       |
| SIM1F              | <i>dendra2</i> (F)          | GCAGCTCTTCGGGTGGAAGCGGCAACCTTATTAAGGAAGATATG               | pSM03                 |
| SIM1R              | <i>dendra2</i> (R)          | GCAGCTCTTCGTTACCATACTTGACTTGGTAG                           |                       |
| SIM2F              | <i>mkate2</i> (F)           | GCAGCTCTTCGGGTGGAGGTGGAGGTGTCTCCGAGCTCATAAAGAAAACA         | pSM04                 |
| SIM2R              | <i>mkate2</i> (R)           | GCAGCTCTTCGCGTACCTCCACCTCCACGGTGTCCGAGCTTGG                |                       |
| SIM3F              | <i>mkate2</i> (F)           | GCAGCTCTTCGACGGGAGGTGGAGGTGTCTCCGAGCTCATAAAGAAAACA         | pSM05                 |
| SIM3R              | <i>mkate2</i> (R)           | GCAGCTCTTCGTTAACGGTGTCCGAGCTTGG                            |                       |
| SIM6F              | <i>mscarlet</i> (F)         | GCAGCTCTTCGGGTGGAGGTGGAGGTGTCTCCAAGGGCGAGGCA               | pSM08                 |
| SIM6R              | <i>mscarlet</i> (R)         | GCAGCTCTTCGTTACTTGTACAGCTCGTCCATTCCT                       |                       |
| mScarlet (SAPC3)F  | <i>mscarlet</i> (F)         | GCAGCTCTTCGGGTGTCTCCAAGGGCGAGGAGTCAT                       | pSDH57                |
| mScarlet (SAPC3)R  | <i>mscarlet</i> (R)         | GCAGCTCTTCGCGTGGCCGGGCTTTTGCAGCGG                          |                       |
| XF84F              | <i>lov</i> (F)              | GCAGCTCTTCGACGCCCTGCTTGTGTCT                               | pXF276                |
| XF84R              | <i>lov</i> (R)              | GCAGCTCTTCGTTAGACCCAAGTGTCCAGCGG                           |                       |
| XF12F              | <i>pie-1 3'UTR</i> (F)      | GCAGCTCTTCGTAATTTTGCCTGATTTTCCAT                           | pXF85                 |
| XF12R              | <i>pie-1 3'UTR</i> (R)      | GCAGCTCTTCGTACATCATCGTTCACATTTTCC                          |                       |
| tb2 3'UTR (SAPC5)F | <i>tb2 3'UTR</i> (F)        | GCAGCTCTTCGTAATAAGCAAGATCCTTCAAGCATTC                      | pSDH54                |
| tb2 3'UTR (SAPC5)R | <i>tb2 3'UTR</i> (R)        | GCAGCTCTTCGTACGACTTTTCTTGTGGCGCAC                          |                       |
| Halo (SAP C3)F     | <i>halotag</i> (F)          | GCAGCTCTTCGGGTGGAAGC                                       | pSDH51                |
| Halo (SAP C3)R     | <i>halotag</i> (R)          | GCAGCTCTTCGCGTTCGGAGATCTCGAGGGTGG                          |                       |
| ePDZ (SAP C4)F     | <i>epdz</i> (F)             | GCAGCTCTTCGACGGGAGGTTCGGAGGATCTGGC                         | pSDH52                |
| ePDZ (SAP C4)R     | <i>epdz</i> (R)             | GCAGCTCTTCGTTACGTCGCGACGGGTGGAT                            |                       |
| unc-54 (SAPC5)F    | <i>unc-54 3'UTR</i> (F)     | GCAGCTCTTCGTAAGAGCTCCGCATCGGCCGCTG                         | pSDH66                |
| unc-54 (SAPC5)R    | <i>unc-54 3'UTR</i> (R)     | GCAGCTCTTCGTACAAACAGTTATGTTTGGTATATTGGGA                   |                       |
| Eg717              | Replace pCFJ350 MCS (F)     | TCGAGTGGCGAAGAGCCATGGATCCCATATGGAATTCTGCAGGCCGTCTTCGGTAA   | pXF87                 |
| Eg718              | Replace pCFJ350 MCS (R)     | CTAGTTACCGAAGAGCAGGCCGTGAGAATCCATATGGGATCCATGGGCTCTTCGCCAC |                       |
| XF30F              | Mutate Sap1 site in pCFJ350 | GATTATGGGCACCTTCTTTATCC                                    | pXF87                 |
| XF30R              | Mutate Sap1 site in pCFJ350 | CGACAAGCAACTTTTCTATAC                                      |                       |
| XF31F              | Mutate Sap1 site in pCFJ350 | AATGGCGAAGGCAAGCAGAG                                       | pXF87                 |
| XF31R              | Mutate Sap1 site in pCFJ350 | GTTTCTGAAAAATAATGTAACCTGAAATTG                             |                       |

Note: For the expression plasmid pJF13 annealed oligos were used to generate HSP-70(aa1-19) in cassette 2.

Additional oligo sequences used to generate pSDH50:

TOMM-20 short forward.

GCAGCTCTTCGATGTCGGACACAATTCTTGGTTTCA AcaaatcaaacgctgtttggctgctgtaattgctgagccgttctcctgctactgattactctgatcataagagaatcaacgctcagactacaaggacaagattagcgaagtcagtttttaacaacatattctctcgattttatctaaacaactattttcttcagagagaCTGTCCACAGGCTGGAGCAggagctgtgcaggcgtgagccggagccGGTCAAGAGCTgc

TOMM-20 short reverse

GCAGCTCTTCGACCggctccggctccagcgccctgcaccagctccTGCTCCAGCCTGGGCACGtctctctgaaagaaaataagttgttttagataaaaatccgaaggaaatattgtttaaactgacttgcctaatct  
gtcctttagtctggagcgttgattctctatgatcgaagtaaatgcagtagccgaggaagcggctccagcaattccagcagccaaaacgacgttgattgTTGAAACCAAGAATTGTGTCCGACATCGAAGAGCt  
gc

**Table 4.** Strains used in this study

| Strain | Genotype                                                                                                                       | Construction                                    | Reference:                   |
|--------|--------------------------------------------------------------------------------------------------------------------------------|-------------------------------------------------|------------------------------|
| EG8078 | <i>oxTi185 I; unc-119(ed3) III</i>                                                                                             |                                                 | Frokjaer-Jensen et al (2014) |
| EG8079 | <i>oxTi179 II; unc-119(ed3) III</i>                                                                                            |                                                 | Frokjaer-Jensen et al (2014) |
| EGD329 | <i>egxSi126 [unc-119(+), pmex-5::hsp-70(aa1-19)::halotag::HDEL::pie-1 3'UTR] I; unc-119(ed3) III</i>                           | Injected pJF13 into EG8078                      | This study                   |
| EGD412 | <i>egxSi136 [unc-119(+); pmex-5::tomm-20::halotag::pie-1 3'UTR] II; unc-119(ed3) III</i>                                       | Injected pJF17 into EG8079                      | This study                   |
| EGD496 | <i>egxSi117 [unc-119 (+); pmex-5::npp-20::gfp::pie-1 3'UTR] I; unc-119(ed3) III</i>                                            | Injected pXF253 into EG8078                     | This study                   |
| EGD497 | <i>egxSi118 [unc-119 (+); pmex-5::npp-20::halotag::pie-1 3'UTR] II; unc-119 (ed3) III</i>                                      | Injected pXF255 into EG8079                     | This study                   |
| EGD549 | <i>egxSi144 [unc-119 (+); pmex-5::cox-4::halotag::pie-1 3'UTR] II; unc-119 (ed3) III</i>                                       | Injected pXF266 into EG8079                     | This study                   |
| EGD565 | <i>egxSi145 [unc-119 (+); pmex-5::hsp-70(aa1-19)::halotag::HDEL::pie-1 3'UTR] II; unc-119 (ed3) III</i>                        | Injected pJF13 into EG8079                      | This study                   |
| EGD623 | <i>egxSi152 [unc-119(+); pmex-5::tomm -20::gfp::pie-1 3'UTR] II; unc-119(ed3) III</i>                                          | Injected pSM16 into EG8079                      | This study                   |
| EGD629 | <i>egxSi155 [unc-119(+); pmex-5::tomm -20::mKate2::pie-1 3'UTR] II; unc-119(ed3) III</i>                                       | Injected pSM20 into EG8079                      | This study                   |
| EGD631 | <i>egxSi155 [unc-119(+); pmex-5::tomm -20::Dendra2::pie-1 3'UTR] II; unc-119(ed3) III</i>                                      | Injected pSM17 into EG8079                      | This study                   |
| EGD633 | <i>egxSi159 [unc-119(+); pmex-5::tomm -20::mScarlet::pie-1 3'UTR] II; unc-119(ed3) III</i>                                     | Injected pSM22 into EG8079                      | This study                   |
| EGD615 | <i>cox-4(zu476[cox-4::eGFP::3XFLAG] I; egxSi136 [unc-119(+); pmex-5::tomm -20::halotag::pie-1 3'UTR] II; unc-119(ed3?) III</i> | Crossed EGD412 and JJ2586                       | This study                   |
| JJ2586 | <i>cox-4(zu476[cox-4::eGFP::3XFLAG] I</i>                                                                                      |                                                 | Raiders et al, 2018          |
| TBD307 | <i>dhc-1(he255[epdz::mcherry::dhc-1] I; utdSi51(Pmex-5::tomm -20(aa1-55)::halotag::lov::tbb-2 3'UTR) II</i>                    | Injected pSDH68 into EG8079. Crossed to SV2095. | This study                   |
| SV2095 | <i>dhc-1(he255[epdz::mcherry::dhc-1] I; ruls57[Ppie-1::gfp::tbb-2 + unc119(+)] V</i>                                           |                                                 | Fielmich et al, 2018         |

**Figure 1**

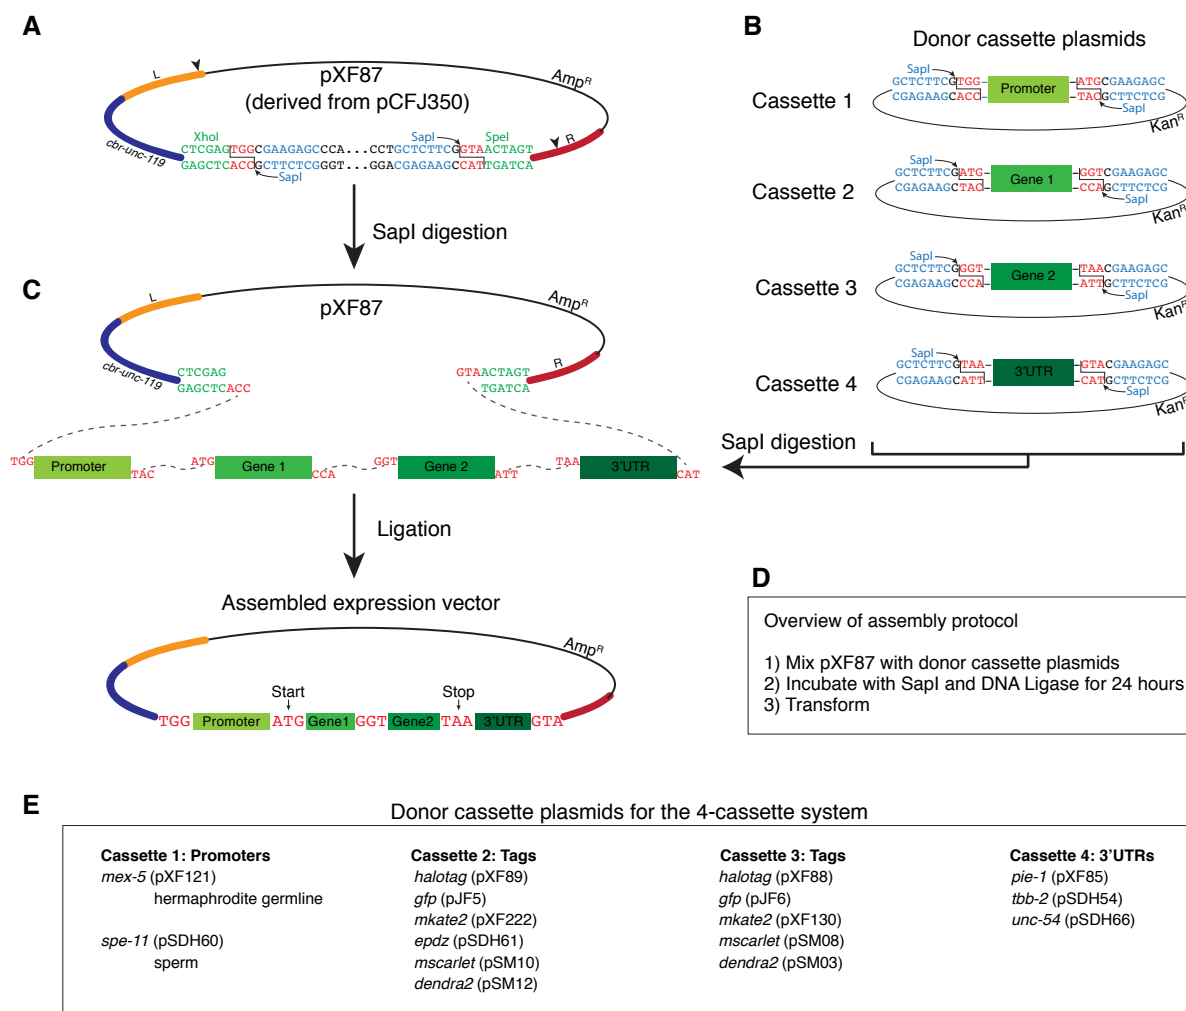

Figure 2

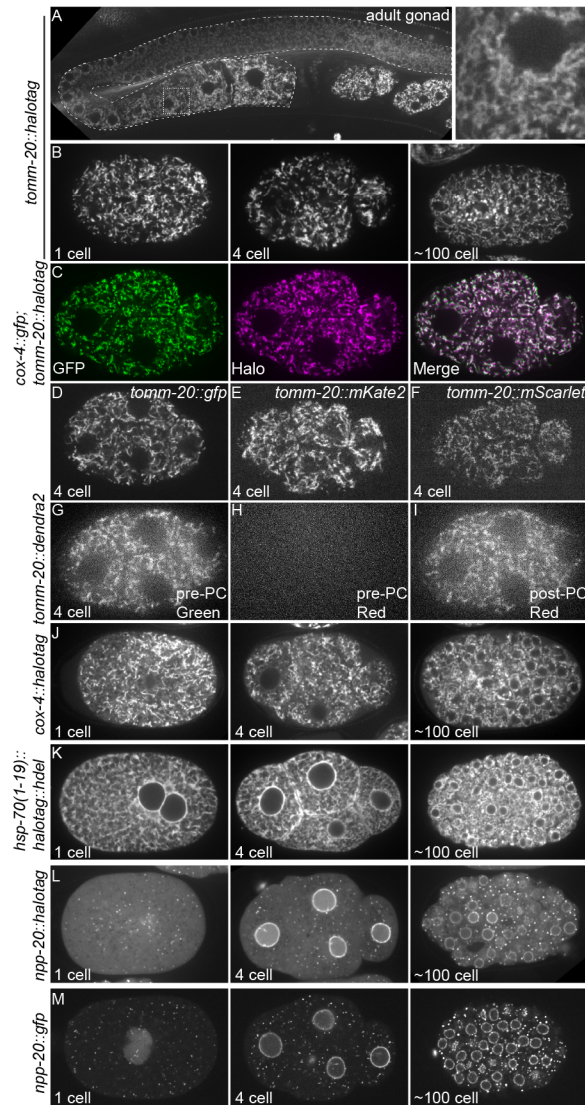

**Figure 3**

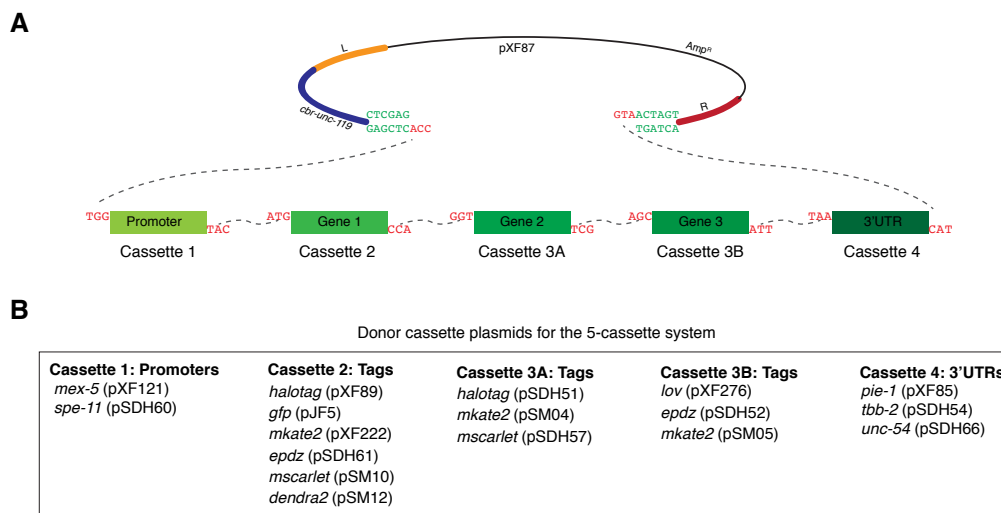

**Figure 4**

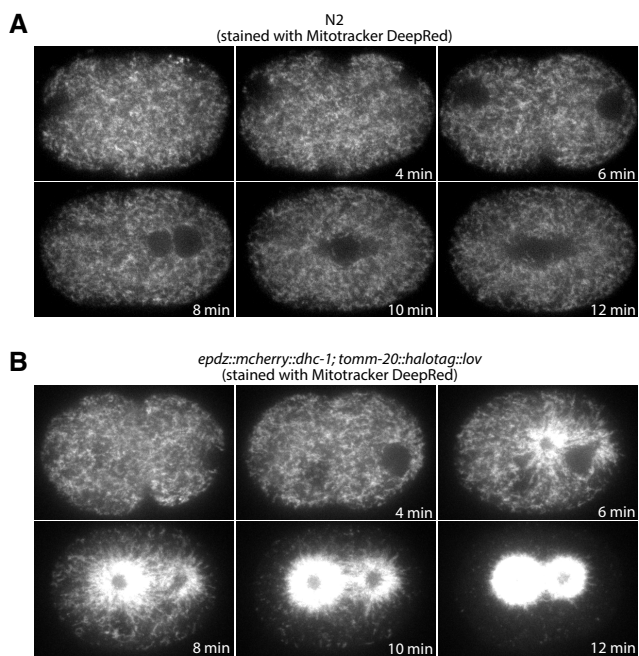

Halotag

pXF89: (Cassette 2) GCTCTTCGATG\_Halotag\_GGAAGCGGCGGTGAAGAGC  
SapI M G S G G SapI

pXF88: (cassette 3) GCTCTTCGGGTGGAAGCGGC\_Halotag\_TACGAAGAGC  
SapI G G S G \* SapI

pSDH51: (cassette 3a) GCTCTTCGGGTGGAAGCGGC\_Halotag\_ACGCGAAGAGC  
SapI G G S G T SapI

GCCGAGgtaaacacttagtttttgttgctctgtttaaaaattaat  
A E  
tttaaagATCGGAACCGGATTCCCATTCGACCCACACTACGTCGAGGTCCTCGGAGAGCGTATGC  
I G T G F P F D P H Y V E V L G E R M  
ACTACGTCGAGCTCGGACCAGTGCAGGAAACCCAGTCTCTTCTCCACGGAAACCCCACTC  
H Y V D V G P R D G T P V L F L H G N P T S  
CTCCTACGTCGGCGTAACATCATCCCACAGTCGCCCAACCCACCGTTGCATCGCCCGAGgt  
S Y V W R N I I P H V A P T H R C I A P  
aagttttcttatgggaaagaaggaacccagattttacttgaaaaatgaaatttttcgcg  
gattttcaccacaaaattgttgaatattcattatttcacgctgtaaaacaaaaaaaaaaaaatc  
aaaaactacgttgaaatcggtttttaagcgaatttcttcagaattgccagattttaacccca  
aatttgcagtttttaataaaaatttcaaccttttcggtcaaattgtagattttctgaaatt  
tagtcaaaaaacaatttctcgtaaaattttcaaatagattttcagACCTCATCGGAATGGGA  
D L I G M G  
AAGTCCGACAAGCCAGACCTCGGATACTTCTTCGACGACCACGTCGTCCTCATGGAGCCTTCA  
K S D K P D L G Y F F D D H V R F M D A F  
TCGAGGCCCTCGACTCGAGGAGTCTCCTCGTCATCCAGACTGGGGATCGGCTCTCGGATT  
I E A L G L E E V V L V I H D W G S A L G F  
CCACTGGGCCAAGCGTAACCCAGAGCGTGTCAAGGAATCGCCTTCATGGAGTTCATCCGTCCA  
H W A K R N P E R V K G I A F M E F I R P  
ATCCCAACCTGGGACGAGTGGCCAGgtaagttatgtctacctgcctgcctaccgcctaaat  
I P T W D E W P  
ttgtgaagtttcttcaaaaaatccagaaaaaaacaattttcatacagattttttcccttaaaa  
ttgtgaatttcatgcttttttagcccaaaagtcattatgtgagaaaaatttcatacaaaaaa  
gttttgagaaatacacaaattttttaaatgtaattttcaaattttcaactagaaaatt  
cacaaaacttgtaaattttggaacaaacatttatacaattacttttttgaaatctaataacta  
caataactacaaattttaacattttcagAGTTCGCCCGTGAGACATTCAGCCTTCCGTACCAC  
E F A R E T F Q A F R T T  
CGACGTCGGACGTAAGTTCATCATCGACCAAAACGTCCTCATCGAGGGAACCCCTCCCAATGGGA  
D V G R K L I I D Q N V F I E G T L P M G  
GTCGTCGTCCTCACTACCGAGGTCGAGATGGACCCTACCGTGAGCCATTCCTCAACCCAGTGC  
V V R P L T E V E M D H Y R E P F L N P V  
ACCGTGAGCCACTTGGCGTTTCCCAAACGAGCTCCCAATCGCCGAGAGCCAGCCAACATCGT  
D R E P L W R F P N E L P I A G E P A N I V  
CGCCCTCGTCGAGGAGTACATGGACTGGCTCCACCAATCCCAAGTCCCAAGCTCCTCTCTG  
A L V E E Y M D W L H Q S P V P K L L F W  
GGAACCCAGgtaagttcttttttgaaaagtgcagtttgtagtctaattttcattttttct  
G T P  
Ttttaaaaaacgcatcaattttaaatattttgggacaaaaatccgaaaactgtactaatttgtg  
gtttgtaaaaatataaaaaaacgcaaaaaatgtttcaaaaatgottagaataaaaaataaaa  
tttctaaaaaattgacaaaataaacatttaaaaaatcaaaaagtttgaaaaatgcaagttt  
tttaatgcaaaaaatatttaattgtaaacaaaatataaaaaatggtgtaagaatggttagag  
acagtttttaaatgttaaatgcaaaaaaaagcaaaaaaaatgtaaaatgtaacaga  
aaattttaataaaaaagtcgtgttttttcaaacctgcaattcttggtaattttattataaa  
gagaaacaaatcaaattgtatattacgaaaaacgataactaaaattcgaaaatggtggttttt  
gcgtaaaaaatacgggttccgtaattttcagGAGTCTCATCCACCAGCCGAGGCCGCCGCT  
G V L I P P A E A A R L  
CGCCAAGTCCCTCCCAAACGCAAGGCCGTCGACATCGGACCAGGACTCAACCTCCTCCAAGAG  
A K S L P N C K A V D I G P G L N L L Q E  
GACAACCCAGgtaagttcatagattttgaaaaaaagttaagaactgaaaaatggaataaaaaat  
D N P  
Atttaagagcatttttaaatgtaaaatatacaaaaaagcgccctaagaatgtttcaaaaacagt  
aaaaaaaagggttttaaaaaatgcaaaaaaaatgtaagatgcttttaattacacaaaaaatgaa  
agtaaaaaaaatataaatgtaaaatgtatattgtttgaaaaggtacattttcaatgcaa  
aaaatgtttctaaaaatataaaaaatggttaaatgtgtaaaagttaaaatataaaaaataaaa  
ttatgaaaaagttatggttcatactttttctaaatgttggtaaaaaatataaaatccagctt  
tttatcacattatgtgttctaaaaatctttccccaattttcgggaccggtttccagtatatt  
ccatttttcaaaaagatttttaactgaaattcatggttttcaatgtaaaaaatcaataaaaaag  
aatttttcagACCTCATCGGTTCCGAGATCGCCCGTTGGCTCTCCACCCTCGAGATCTCCGGA  
D L I G S E I A R W L S T L E I S G

**Figure S1.** Sequence of HaloTag donor cassettes. Cassette-specific flanking sequences are shown at the top. The SapI recognition sites are in blue and the cleavages sites are in red.



ceGFP with PATC introns

pJF5: (cassette 2) GCTCTTCGATG\_ceGFP\_GGAAGCGCGGT\_CGAAGAGC  
SapI M G S G G SapI

pJF6: (cassette 3) GCTCTTCGGTGGAAAGCGGC\_ceGFP\_TAAACGAAGAGC  
SapI G G S G \* SapI

TCCAAGgtaacacttagtttttgttgcctgttttaaaataat  
S K  
tttaagGGAGGAGCTGTTCCACGGAGTCCGTCCTCCGTCGAGCTCGACGGGGACGTC  
G E E L F T G V V P I L V E L D G D V  
ACGGACACAAGTTCTCCGTGTCGGAGAGGGAGAGGATGCCACCTACGGAAAGCTCACCT  
N G H K F S V S G E G E G D A T Y G K L T L  
CAAGTTCATCTGCACCACCGAAAGCTCCAGTCCCATGGCCAACCTCGTACCACCTTCTGC  
K F I C T T T G K L P V P W P T L V T T F C  
TACGGAGTCCAATGCTTCTCCGTTACCCAGgtaagttttctgttttatttactgtttctgag  
Y G V Q C F S R Y P  
Aattgggatttttagctgaaaaattggattttaagatgaaaaattgaaattttcaactaaaaat  
tcaatttttagctgaaaaattgaaatttttagctaaagatgggatttttagtgaaaaatcga  
gatttctagctaaaaagatgatttttagctgaaagattggaattttaagcagaaaaattgta  
tttttagctgataaatcaattttaagcggaaaaattgaaatttttagctaaaaattccattt  
tcaactaaaaatcgtgatttttagctttaaaaattggatttttagctgaaaaatcggattttta  
gctgaaaaattgaaatttttagttaaagtgagatttttaacagaaaaagtgagatttttagt  
taaaaaataatttttagctaaaaatacaattttcaactaaagatcgtgatttttagcttta  
aaaaattggatttttagctaaaaatcggatttttagctgaaaaattgaaatttttttagttaa  
gtgggattttaagatgaaaaagtgagatttttagctgaaaaagtgagatttttagctaaaaata  
caattttcaactgaaaaattgggatttttagctttaaaaattggatttttagctttaaaaattg  
gttttttagctgaaaaagtgagatttttagttaaagattgaaatttttagctgaaaaattggaa  
tttttaagtaaaaattgggattttaagatgaaaaagtgagatttttagctgaaaaagtgagat  
tttagctaaaaatacaattttcaactgaaaaattgggatttttagctgaaaaagtgagacgaa  
agacgaaaaaaaatcgattttttacaaaaattagatttttagACCACATGAAGCGTCACGA  
D H M K R H D  
CTTCTTCAAGTCCGCCATGCCAGAGGATACGTCCAAGAGCGTACCATCTTCTCAAGGACGAC  
F F K S A M P E G Y V Q E R T I F F K D D  
GGAAACTACAAGgtaagttatgtacgagattttctcggcgaaaaattggacttttttgcctaaaa  
G N Y K  
Actgaatttttagctgttttttgcactgaaaaatgctgaaaaattggttttttgcgtaaaattca  
cggaaaaagctgaaaaatattgcagaaatcgacgaaaaatgcttttttgcgtaaaattcagcc  
agaaaaattgttcagaaatcgcaattttcctgcaaaaatcgacgttttttgcgcaaaaattggtagat  
ttgaaaccgaaaaattgtgaaaaattggacttttttgcctaaaaacagactttttgagctttttt  
acactgaaaaattgggaaaaattggattttccagcagaaaaattcgaaattttcaatttttggcg  
gaaatttgacgaaaaatatgaaaaaacccgatttttgcctgaaaaagttcaaaagccgaaaa  
attggccaaaaatctccaaaaatcgacttttttgcggttttttgcgtaaaaaattgaaatttttt  
tgaaaaattgagcaaaaatcgccgaaaaaccgctaaaaaaaactgcccgaattggcaattttgag  
cttaaaaaaacttgaaaaatgctcaaaattacccaattttcaccggaaattgagctaaaaatcgt  
cgaaaaagactgaaattttcaatttttagctgaaaaatctgcctattttcggctaaaaattgcttta  
aaaaatcaaaattcaaaatttttggctaaaaataactcagattgoccttttttttccaaaaa  
tgacaaaaaaaatcaatcagaaaaatcgactttttttacaaaaattggctcaaaaacgctct  
aaattctccctaatttttgcctgtaaaattgtgcaaaaaatcaccgaaaaatgacgatttttagg  
ctgaaaaatctcaaaaaagctcaaaattcccaacttttcaccgcaaaaaagcagaaaaagctc  
caattttatcgattaaactttttagACCCTGCGAGGTCAAGTTCGAGGGAGACCCCTCGTC  
T R A E V K F E G D T L V  
AACCGTATCGAGCTCAAGGGAATCGACTTCAAGGAGGACGGTAAACATCCTGGGACACAAGCTGG  
N R I E L K G I D F K E D G N I I L G H K L  
AGTACAACCTACAACCTCCACAACGTCTACATCATGGCCGACAAGCAAAGAACGGAATCAAGGT  
E Y N Y N S H N V Y I M A D K Q K N G I K V  
CAACTTCAAGgtaagttcttttttgcctgatttttgagtgaaaaattgaggaattcaca  
N F K  
aatggccaaaagaatcctcaaaattggccgaaaaattctgaaaaatgacctaaaaatcaccgaaaa  
acggccaaaaatctgaaaaatcgccgaaaaatctcaaaattttgaggaattcccgctaaaaat  
taataaaaaatcaccgaaaaaaggccaaaaattacctaataaagccgcaaaaatcgctaaaaag  
caaaaatctgaaaaatggcgaatttcaattttttcacacacaaaaaatccctgaattttctta  
tttttactcgaaaaatctgtgattttacggggtaaaaaatcagtttttagtgctatttcacaag  
aaaaacacagcattttcgcaaaaaactcggatttttaagccaaaaattgaggttttttagtttt  
ttacgtgaaaaactgaaatttttgcacaaaaaacacttttttttagactaaaaatcaattttc  
atcaaaaatcactaaattttgcctgaaaaaatatagatttttccactttttcactgaaaaaaaac  
tggattttcactgaaaaatcaagttgttttttagacaaaaattttatttttccgctgaaaaatta  
tcgtttttcagctcaattttcagctaaaaatccctgaaattctggattttcagccaaaaaacctg  
aaattttcacaacaccccggttaaaaaatgagtttagactgaaaaatccgattttttgagccaa  
aaatttgatttttaactgaaaaaaattggattttcaacaaaaaatcagtttttcagtgatttt  
tagagtaaaaaatcactgatttttaacacaaaaatccagtttttgcggtattttcactgaaaaatc  
ccgatttttccccaaaaaatccatttttccgactaaaaatcccccaagtaattttcagATCCGT  
I R  
CACAACTCGAGGACGGATCGGTCCAACCTCGCCGACCCTACCAACAAAAACCCCAATCGGTG  
H N I E D G S N V Q L A D H Y Q Q N T P I G  
ACGGACAGTCTCTCCAGACAACCCTACCTCTCCACCAATCCGCCCTCTCAAGGACCC  
D G P V L L P D N H Y L S T Q S A L S K D P  
AAACGAGAAGCGTGACCACATGGTCTCCCTCGAGTTCGTACCCGCGGAAATCACCACGGA  
N E K R D H M V L L E F V T A A G I T H G  
ATGGACGAGCTCTACAAG  
M D E L Y K

**Figure S2.** Sequence of ceGFP donor cassettes. Cassette-specific flanking sequences are shown at the top. The SapI recognition sites are in blue and the cleavages sites are in red.

mKate2

pXF222 (Cassette 2) GCTCTTCGATG\_mKate2\_GGAGGTGGAGGTGGT CGAAGAGC  
 SapI M G G G G G SapI

pXF130 (Cassette 3) GCTCTTCGGTGGAGGTGGAGGT\_mKate2\_TAACGAAGAGC  
 SapI G G G G G \* SapI

pSM04 (Cassette 3a) GCTCTTCGGTGGAGGTGGAGGT\_mKate2\_AGCCGAAGAGC  
 SapI G G G G G S SapI

pSM05 (Cassette 3b) GCTCTTCGAGCGGAGGTGGAGGT\_mKate2\_TAACGAAGAGC  
 SapI S G G G G \* SapI

GTCTCCGAGCTCATTAAAGAAAACATGCATATGAAGCTCTACATGGAGGGAAC  
 V S E L I K E N M H M K L Y M E G T  
 CGTCAACAACCACCCTCAAGTGCACCTCCGAGGGAGAGGGAAAGCCATACGAGGGAACCCAA  
 V N N H H F K C T S E G E G K P Y E G T Q  
 ACCATGCGTATCAAGGCCGTCGAGGGAGGACCCTCCATTGCGCTTCGACATCCTCGCCACCT  
 T M R I K A V E G G P L P F A F D I L A T  
 CCTTCATGTACGGATCCAAGgtaagtttaaacatataataactaactaaccctgattatthaa  
 S F M Y G S K  
 ttttcagACCTTCATCAACCACACCCAAGGAATCCCAGACTTCTTCAAGCAATCCTCCAGAG  
 T F I N H T Q G I P D F F K Q S F P E  
 GGATTCACCTGGGAGCGTGTACACACCTACGAGGACGGAGGAGTCTCACCGCCACCCAAGACA  
 G F T W E R V T T Y E D G G V L T A T Q D  
 CCTCCCTCCAAGACGGATGCCTCATCTACAACGTCAAGgtaagtttaaacagttcggtaactaac  
 T S L Q D G C L I Y N V K  
 taaccatacatatthaaattttcagATCCGTGGAGTCAACTTCCCATCCAACGGACCAGTCATG  
 I R G V N F P S N G P V M  
 CAAAAGAAGACCCTCGGATGGGAGGCCCTCCACCAGACCCTTACCCAGCCGACGGAGGACTTG  
 Q K K T L G W E A S T E T L Y P A D G G L  
 AGGGACGTGCCGACATGGCCCTCAAGCTCGTCCGAGGAGGACACCTCATCTGCAACCTCAAGgt  
 E G R A D M A L K L V G G G H L I C N L K  
 aagtttaaacatgattttactaactaactaatctgattthaaattttcagACCACCTACCGTTCC  
 T T Y R S  
 AAGAAGCCAGCCAAGAACCTCAAGATGCCAGGAGTCTACTACGTCGACCGTCGTCTTGAGCGTA  
 K K P A K N L K M P G V Y Y V D R R L E R  
 TCAAGGAGGCCGACAAGGAGACCTACGTCGAGCAACACGAGGTCGCCGTCGCCCGTTACTGCGA  
 I K E A D K E T Y V E Q H E V A V A R Y C D  
 CCTCCCATCCAAGCTCGGACACCGT  
 L P S K L G H R

**Figure S3.** Sequence of mKate2 donor cassettes. Cassette-specific flanking sequences are shown at the top. The SapI recognition sites are in blue and the cleavages sites are in red.

mScarlet

pSM10 (Cassette 2) GCTCTTCGATG\_mKate2\_GGAGGTGGAGGTGGTCGAAGAGC  
SapI M G G G G G SapI

pSM08 (Cassette 3) GCTCTTCGGGTGGAGGTGGAGGT\_mScarlet\_TAACGAAGAGC  
SapI G G G G G \* SapI

pSDH57 (Cassette3a)

GCTCTTCGGGT\_mScarlet\_TTGGCTGAAGCGGCAGCTAAAGAAGCTGCCGCGAAGGAAGCAG  
SapI G L A E A A A K E A A A K E A  
CAGCCAAGGAGGCCGAGCGAAGGAAGCCGCTGCAAAAAGCCCGGCCACGCGAAGAGC  
A A K E A A A K E A A A K A A A S SapI

GTCTCCAAGGGCGAGGCAGTCATCAAGGAGTTCATGCGTTT  
V S K G E A V I K E F M R F  
CAAGGTGCACATGGAGGGATCCATGAACGGACACGAGTTCGAGATCGAGGGCGAGGGAGAGGGA  
K V H M E G S M N G H E F E I E G E G E G  
CGCCCATACGAGGGAACCCAGACCCGCAAGCTCAAGGTGACCAAGgtaagtttaaacatatata  
R P Y E G T Q T A K L K V T K  
tactaactaacacctgattattttaaatcttcagGGTGGACCCTGCCATTTCTCTGGGACATCCT  
G G P L P F S W D I L  
CTCCCCACAATTCATGTACGGCTCCCGTGCCTTACCAAGCACCCAGCCGACATCCCCGACTAC  
S P Q F M Y G S R A F T K H P A D I P D Y  
TACAAGCAATCCTTCCCCGAGGGATTCAGTGGGAGCGCGTGTGAACCTTCGAGGACGGAGGAG  
Y K Q S F P E G F K W E R V M N F E D G G  
CCGTGACCGTCACCCAAGACACCTCCCTGGAGGACGGAACCCCTCATCTACAAGGTGAAGTCCG  
A V T V T Q D T S L E D G T L I Y K V K L R  
TGGAACCAACTTCCACCTGACGGCCAGTCATGCAGAAGAAGACCATGGGATGGGAAGCCTCC  
G T N F P P D G P V M Q K K T M G W E A S  
ACCGAGCGTTTGTACCCAGAGGACGGAGTGTCAAGgtaagtttaaacagttcggtaactaacta  
T E R L Y P E D G V L K  
accatacatattttaaatcttcagGGAGACATTAAGATGGCCCTCCGTCTGAAGGACGGAGGACG  
G D I K M A L R L K D G G R  
TTACCTGGCGGACTTCAAGACCACCTACAAGCCAAGAAGCCAGTCCAGATGCCAGGAGCCTAC  
Y L A D F K T T Y K A K K P V Q M P G A Y  
AACGTCGACCGCAAGCTCGACATCACCTCCCAACGAGGACTACACCGTCGTGGAGCAATACG  
N V D R K L D I T S H N E D Y T V V E Q Y  
AACGTTCCGAGGGACGCCACTCCACCGGAGGAATGGACGAGCTGTACAAG  
E R S E G R H S T G G M D E L Y K

**Figure S4.** Sequence of mScarlet donor cassettes. Cassette-specific flanking sequences are shown at the top. The SapI recognition sites are in blue and the cleavages sites are in red.

Dendra2

pSM12 (Cassette 2) GCTCTTCGATG\_Dendra2\_GGAAGCGGCGGTCTGAAGAGC  
SapI M G S G G SapI

pSM03 (Cassette 3) GCTCTTCGGGTGGAAGCGGC\_Dendra2\_TAACGAAGAGC  
SapI G G S G \* SapI

```
AACCTTATTAAGGAAGATATGAGAGTCAAAGTGCATATGGAAGG
N L I K E D M R V K V H M E G
AAACGTCAACGGTCATGCATTTGTTATGGAAGTGAAGGTAAAGGAAAGCCATACGAAGGAACT
N V N G H A F V I E G E G K G K P Y E G T
CAAACGTAACTTGACTGTCAAAGAAGGAGCACCCTACCATTTAGTTACgtaagtttaaca
Q T A N L T V K E G A P L P F S Y
tatatataactaactaaccctgattattttaaatTTTcagGATATTCTCACTACTGCCGTCCATTA
D I L T T A V H Y
CGGAAACAGAGTTTTTACTAAATACCCAGAAGATATTCCTGATTACTTCAAGCAATCGTTTCCA
G N R V F T K Y P E D I P D Y F K Q S F P
GAAGGATACTCGTGGAAAGAAGTATGACTTTTTCGAAGATAAAGGTATTTGCACTATTgtaagtt
E G Y S W E R T M T F E D K G I C T I
taaacagttcggtaactaactaaccatacatatTTTaaatTTTcagAGAAGTGATATTAGTCTCGA
R S D I S L E
AGGTGATTGCTTCTTCCAAAATGTGAGATTTAAAGGTACTAACTTTCTCCTAACGGACCAGTT
G D C F F Q N V R F K G T N F P P N G P V
ATGCAAAAGAAGACTCTTAAGTGGGAACCATCGACTGAAAACTACATGTTAGAGATGGACTAC
M Q K K T L K W E P S T E K L H V R D G L
TTGTTGGAgtaagtttaacttggacttactaactaacggattatTTTaaatTTTcagAACAT
L V G N I
TAACATGGCACTACTACTAGAAGGTGGAGGTCACTACCTTTGCGATTTTAAAACCACTTACAAA
N M A L L L E G G G H Y L C D F K T T Y K
GCAAAGAAGTTCGTCCTCAACTTCCAGATGCACACTTTGTTGATCACAGAATTGAAATAC TAGGAA
A K K V V Q L P D A H F V D H R I E I L G
ACGATTCCGATTACAACAAGTTAAGCTATACGAACACGCAGTTGCAAGATACAGTCTCTACC
N D S D Y N K V K L Y E H A V A R Y S P L P
AAGTCAAGTATGG
S Q V W
```

**Figure S5.** Sequence of Dendra2 donor cassettes. Cassette-specific flanking sequences are shown at the top. The SapI recognition sites are in blue and the cleavages sites are in red.

ePDZ

PSDH61 (Cassette 2) GCTCTTCGATG\_ePDZ\_GGAGCTGGTCTGAAGAGC  
SapI M G A G SapI

pSDH52 (Cassette 3b)

GCTCTTCGAGCGGAGGTTCCGGAGGATCTGGCGGATCT\_ePDZ\_TAACGAAGAGC  
SapI S G G S G G S G G S \* SapI

CCAGAGCTCGGATTCTCGATCTCCGGAGGTGTCGGAGGCCGTGGAAATCCATTCCGTCCTGACG  
P E L G F S I S G G V G G R G N P F R P D  
ATGATGGAATTTTTGTTACTCGGGTCCAACCAGAAGACCAGCTAGCAAACCTTCTTCAACCTGG  
D D G I F V T R V Q P E G P A S K L L Q P G  
AGACAAGgtaagttaattaatttcacgagagatcgtgcaattttctcattcatgaagacttttc  
D K  
agATCATCCAAGCCAACGGTTACTCTTTTCATTAATATTGAGCACGGTCAGGCTGTCAGCCTTCT  
I I Q A N G Y S F I N I E H G Q A V S L L  
CAAGACCTTCCAGAACACAGTCGAGCTCATCATCGTCCGAGAGGTAGGAAACGGAGCTAAGCAG  
K T F Q N T V E L I I V R E V G N G A K Q  
GAGATCCGTGTCCGCGTCGAAAAGGACGGAGGATCCGGAGgtaagttataatctcctacaaa  
E I R V R V E K D G G S G  
tttaaaactgacttacttttttctaatttttcagGAGTTTCCAGTGTTCACCAACCTTGAGGT  
G V S S V P T N L E V  
CGTTGCTGCCACACCAACAAGCCTTCTCATCTCCTGGGATGCTTACCGTGAACCTTCCAGTCTCC  
V A A T P T S L L I S W D A Y R E L P V S  
TACTATAGGATCACCTACGGAGAGACCGGAGGAAATCTCCAGTCCAAGAATTCACGGTCCCAG  
Y Y R I T Y G E T G G N S P V Q E F T V P  
gtaagttataatctcctacaaaagtaatttgagaggtacaatattttcagGAAGC  
G S  
AAGTCGACCGCCACAATTTCCGGATTGAAGCCAGGAGTCGACTACACCATCACTGTCTATGCTC  
K S T A T I S G L K P G V D Y T I T V Y A  
ATTACAATATCATTACTACTCATCACCAATCTCCATCAATTATAGAACGAGTAGATTGGAGCT  
H Y N Y H Y Y S S P I S I N Y R T S R L E L  
CAAGCTCCGTATTTTGCAATCGACAGTGCCACGCGCCCGTGATCCACCCGTCGCGACG  
K L R I L Q S T V P R A R D P P V A T

**Figure S6.** Sequence of ePDZ donor cassettes. Cassette-specific flanking sequences are shown at the top. The SapI recognition sites are in blue and the cleavages sites are in red.

LOV

pXF276 (Cassette 3b) GCTCTTCGAGC\_LOV\_TAACGAAGAGC  
SapI S \* SapI

```
CCTCGTCTTGCTGCTGCACTTGAGCGCATTGAGAAGAATTTTGTAATCACCGATCCCCGACTTC
P R L A A A L E R I E K N F V I T D P R L
CGGATAACCCAATCATTTTCGCTTCTGATTCGTTCCCTTCAGCTCACCGAGTATTCACGTGAAGA
P D N P I I F A S D S F L Q L T E Y S R E E
GgtaagtttaattaattaagttccaaatcaagatacgttcttttcgccatacattttcagATCC
I
TTGGAAGAAATTGCCGATTCTCCAGGGACCAGAACTGACAGAGCTACCGTCAGAAAGATCCG
L G R N C R F L Q G P E T D R A T V R K I R
TGACGCCATCGACAATCAGACTGAGGTTACCGTCCAGCTCATCAACTACACCAAGTCCGGAAAG
D A I D N Q T E V T V Q L I N Y T K S G K
gtaagttataattttcgcatttggtgtatcgtatcaatgtttaactgaatttttcagAAGTTCT
K F
GGAATCTTTTCCATCTTCAACCAATGCGTGATCAGAAGGGAGATGTTCAATACTTCATTGGAGT
W N L F H L Q P M R D Q K G D V Q Y F I G V
TCAACTCGATGGAACCGAACATGTTTCGTGACGCTGCCGAGCGTGAAGCTGTTATGCTCGCCAAG
Q L D G T E H V R D A A E R E A V M L A K
AAGACTGCTGAAGAAATTGATAAAGCCGTCGACACTTGGGTC
K T A E E I D K A V D T W V
```

**Figure S7.** Sequence of LOV donor cassette. Flanking sequences are shown at the top. The SapI recognition sites are in blue and the cleavages sites are in red.
